## INDEX TO VOLUME XX

## A

- Acanthis linaria linaria*, 129  
*Accipiter cooperi*, 18, 40, 127  
     *velox*, 127  
*Aegialitis semipalmata*, 185  
*Aeronautes melanoleucus*, 103  
*Agelaius phoeniceus nevadensis*, 72  
     *phoeniceus phoeniceus*, 41, 186, 214  
     *tricolor*, 18  
*Aimophila ruficeps eremoeca*, 42, 212  
*Aix sponsa*, 91  
*Ajaia ajaja*, 79  
*Albatross*, Black-footed, 179, 180  
*Aluco pratincola*, 40  
*Ammodramus savannarum bimaculatus*, 42  
*Amphispiza belli belli*, 190  
     *bilineata bilineata*, 42  
     *bilineata deserticola*, 23  
*Anas platyrhynchos*, 75  
 Anderson, R. M., and Taverner, P. A., review of their "summary report of the geological survey of Canada, 1916", 141  
*Anhinga*, 38  
*Anhinga anhinga*, 38  
*Anser albifrons albifrons*, 85  
*Anthus rubescens*, 45  
     *spraguei*, 24  
*Antrostomus carolinensis*, 41  
     *vociferus macromystax*, 22  
*Aphelocoma californica californica*, 12, 18, 71, 117  
     *californica immanis*, 190  
     *californica obscura*, 60  
     *sieberi arizonae*, 21  
     *texana*, 212  
*Aphriza virgata*, 85  
*Aquila chrysaetos*, 72, 191  
*Archibuteo ferrugineus*, 127  
     *lagopus sancti-johannis*, 91  
*Archilochus alexandri*, 21, 41, 46  
*Ardea herodias herodias*, 18, 185  
*Ardetta exilis*, 39  
*Asio flammeus*, 101, 125, 127  
     *wilsonianus*, 127  
*Astragalinus psaltria hesperophilus*, 16  
     *tristis salicamans*, 16  
*Astur atricapillus*, 141  
*Asyndesmus lewisi*, 18  
*Auklet*, Cassin, 180  
     *Paroquet*, 85  
*Auriparus flaviceps flaviceps*, 43

## B

- Baeolophus atricristatus sennetti*, 43  
     *wollweberi*, 21  
 Bailey, Florence Merriam, a return to the Dakota Lake region, 24, 64, 110, 132, 170  
 Baldpate, 123  
 Belding, Lyman, death notice, 47; photo of, 50  
 Bergtold, W. H., review of his "a study of the incubation periods of birds—what determines their length?", 95  
 Bittern, American, 28, 35, 75, 112, 136  
     *Least*, 39  
 Blackbird, Brewer, 72  
     *Nevada Red-wing*, 72  
     *Red-winged*, 18, 31, 41, 64, 65, 186  
     *Tricolored*, 18  
     *Yellow-headed*, 34, 69  
 Bluebird, 44  
     *Western*, 16, 18, 71  
 Bobolink, 34, 68, 112, 113  
 Bob-white, Texas, 39  
*Bombycilla cedrorum*, 186  
*Bonasa umbellus*, 185  
*Botaurus lentiginosus*, 75  
 Bowles, J. H., northern owls again visit Washington, 45; two more records for the widgeon in Washington and other notes, 93  
*Brachyramphus marmoratus*, 184  
 Bradbury, William C., notes on the nesting habits of the white-throated swift in Colorado, 103; notes on the nesting of the mountain plover, 157; nesting of the rocky mountain jay, 197  
*Branta canadensis*, 185  
 Bryant, Harold C., evidence on the food of hawks and owls in California, 126; a new bird for Catalina Island, 193  
*Bubo virginianus pacificus*, 125, 127  
     *virginianus pallescens*, 40  
     *virginianus saturatus*, 45  
 Bunting, Indigo, 23, 24  
     *Lazuli*, 19, 23, 212  
     *Painted*, 42, 191  
 Bush-tit, Lead-colored, 170  
*Buteo borealis calurus*, 40, 72, 127, 191  
     *borealis krideri*, 214  
     *lineatus alleni*, 40  
     *swainsoni*, 191  
*Butorides virescens anthonyi*, 169  
     *virescens virescens*, 39

## C

- Calcarius ornatus*, 87  
*Callipepla squamata castanogastris*, 39  
*Calypte anna*, 16, 18, 123  
     *costae*, 21, 114, 168  
*Camptostoma imberbe*, 212  
*Cardellina rubrifrons*, 168  
*Cardinal*, Gray-tailed, 42  
*Cardinalis cardinalis canicaudus*, 42  
 Carpenter, Nelson K., observations in a swallow colony, 90; an odd nest of the song sparrow of Los Coronados Islands, 124  
*Carpodacus cassini*, 71  
     *mexicanus frontalis*, 15  
 Catbird, 28, 30  
*Catharista urubu*, 24, 40  
*Cathartes aura septentrionalis*, 40  
*Catherpes mexicanus conspersus*, 43, 168  
*Centurus carolinus*, 24  
     *aurifrons*, 41  
*Cepphus columba*, 184  
*Certhia familiaris zelotes*, 76  
*Ceryle alcyon*, 186  
     *alcyon caurina*, 72  
     *americana septentrionalis*, 41  
*Chaemepelia pallescens pallescens*, 169  
*Chaetura vauxi*, 16, 18  
 Chapman, Frank S., review of his "the distribution of bird life in Colombia", 95  
 Chat, Yellow-breasted, 43  
 Chen rossi, 24  
*Chickadee*, Chestnut-backed, 186  
     Mountain, 13, 16, 21, 71, 72, 73, 76, 97, 199  
     Oregon, 61  
     Plumbeous, 43  
*Chicken*, Prairie, 30, 110, 132, 134  
*Chondestes grammacus strigatus*, 42, 190  
*Chordeiles acutipennis texensis*, 41, 96  
     *virginianus henryi*, 22  
     *virginianus hesperis*, 24, 73  
 Chuck-wills-widow, 41  
*Cinclus mexicanus unicolor*, 13, 70  
*Circus hudsonius*, 18, 40, 127  
*Clangula islandica*, 3  
*Coccyzus americanus americanus*, 41  
*Coeligena clemenciae*, 168  
*Colaptes auratus*, 186  
     *auratus cafer*, 216  
     *auritus cafer*, 142  
     *cafer collaris*, 72  
     *chrysoides*, 169  
*Colinus virginianus texanus*, 39  
*Columba fasciata fasciata*, 15, 45, 185  
*Colymbus dominicus brachypterus*, 38  
     *holboelli*, 93, 184  
     *nigricollis californicus*, 16, 18, 38  
 Communication, 213  
*Contopus pertinax pallidiventris*, 167, 168  
     *richardsoni richardsoni*, 168

- Cooper Ornithological Club, directory of members, 147; minutes of, 99, 144, 194  
*Coot*, American, 8, 32, 35, 36, 39, 92, 170, 193  
*Cormorant*, Brandt, 85  
*Corvus brachyrhynchos*, 140  
     *caurinus*, 186  
     *corax*, 186  
 Cory, Charles B., review of his "catalogue of birds of the Americas and adjacent islands in Field Museum of Natural History", 143  
*Cowbird*, Dwarf, 41, 211  
*Creepers*, Rocky Mountain, 199  
     Sierra, 76  
*Crossbill*, Bendire, 22, 24  
     White-winged, 85  
*Crow*, American, 27, 30, 34, 140, 170, 172  
     Northwest, 186  
*Cryptoglaux acadica brooksi*, 144  
*Cuckoo*, Yellow-billed, 41, 136  
*Cyanocephalus cyanocephalus*, 74, 190  
*Cyanocitta stelleri*, 186  
     *stelleri diademata*, 168  
     *stelleri frontalis*, 16, 76  
*Cyanolaemus clemenciae bessophilus*, 181  
     *clemenciae clemenciae*, 181  
*Cyanospiza ciris*, 42, 191

## D

- Dafila acuta*, 77  
 Davis, John M., long waits for sets of the winter wren, 190  
*Dendragapus obscurus*, 185  
     *obscurus sierrae*, 45  
*Dendroica aestiva brewsteri*, 15, 19  
     *aestiva sonorana*, 168  
     *auduboni auduboni*, 16, 22, 70, 189  
     *auduboni nigrifrons*, 22  
     *chrysoptera*, 43  
     *graciae*, 168  
     *nigrescens*, 46  
 Dice, Lee R., notes on the nesting of the redpoll, 129  
 Dickcissel, 42  
*Diomedea nigripes*, 179  
*Dove*, Inca, 40, 169  
     Mexican Ground, 169  
     Mourning, 109, 113, 169, 176  
     Western Mourning, 39  
     White-winged, 169  
*Dowitcher*, Long-billed, 85  
*Dryobates pubescens glacialis*, 85  
     *pubescens homorus*, 22  
     *pubescens turati*, 16  
     *scalaris bairdi*, 41  
     *scalaris cactophilus*, 169  
     *villosus*, 186  
     *villosus hyloscopus*, 16, 86, 169  
     *villosus leucothorectis*, 86  
     *villosus orius*, 71, 86

- Du Bois, A. D., an albino magpie, 189; a late nest of Swainson hawk, 191
- Duck, Golden-eye, 134, 135  
Ring-necked, 24  
Ruddy, 19, 37, 39, 170, 171  
Wood, 34, 56, 91
- Dwight, Jonathan, review of his "the geographical distribution of color and of other variable characters in the genus Junco: a new aspect of specific and subspecific values", 142

**E**

- Eagle, Bald, 185  
Golden, 72, 191, 212  
Harpy, 78
- Editorial notes and news, 47, 94, 128, 140, 194, 213
- Empidonax fulvifrons pygmaeus, 168  
hammondi, 18  
trailli trailli, 168, 211  
wrighti, 78
- Ereunetes mauri, 185
- Erismatura jamaicensis, 19, 39
- Eugenes fulgens, 168
- Euphagus cyanocephalus, 72

**F**

- Falco mexicanus, 127  
sparverius sparverius, 73, 127
- Falcon, Prairie, 127, 195
- Finch, Cassin Purple, 71, 78  
Gray-crowned Rosy, 76  
House, 15
- Fisher, Walter K., in memoriam: Lyman Belding, 51
- Flicker, 27, 35, 176, 186  
Gilded, 169  
Hybrid, 142, 216  
Red-shafted, 72, 73, 74
- Flycatcher, Arizona Crested, 22, 168  
Arkansas, 18  
Ash-throated, 41, 168  
Beardless, 212  
Buff-breasted, 168  
Coues, 21, 167, 168  
Crested, 41  
Gray, 44  
Hammond, 18  
Olivaceous, 168  
Olive-sided, 21, 46  
Scissor-tailed, 41, 212  
Sulphur-bellied, 168  
Traill, 168, 211, 212  
Vermillion, 41, 167  
Wright, 77, 78
- Fringilla crissalis, 117
- Fulica americana, 39, 92, 193

**G**

- Gadwall, 27
- Gallinago delicata, 74, 85
- Gallinula galeata, 39
- Gallinule, Florida, 39  
Purple, 39
- Gavia immer, 184  
pacifica, 24
- Geococcyx californianus, 40
- Geothlypis beldingi, 57, 60  
trichas occidentalis, 16, 169  
trichas sinuosa, 62
- Glaucidium gnoma californicum, 18, 86, 127  
gnoma pinicola, 86
- Gnatcatcher, Blue-gray, 44  
Western, 19
- Goelitz, Walter A., the short-eared owl in Saskatchewan, 101
- Golden-eye, 3, 27, 177  
Barrow, 3
- Goldfinch, 136, 176  
Green-backed, 16  
Willow, 16
- Goose, Blue, 56  
Canada, 44, 71, 75, 185  
Ross Snow, 24  
White-fronted, 85
- Goshawk, 216  
Western, 141
- Grackle, Bronzed, 42  
Great-tailed, 42
- Grebe, American Eared, 16, 18, 38, 136, 196  
Holboell, 171, 175, 184  
Horned, 93  
Mexican, 38  
Pied-billed, 189
- Grey, Henry, wood duck at San Diego, 91; wood ibis at San Diego, 126
- Grinnell, H. W., review of T. Gilbert Pearson's "the bird study book", 48
- Grinnell, Joseph, the status of the white-rumped petrels of the California coast, 56; seven new or noteworthy birds from east-central California, 86; the name of the American barn swallow, 92; review of W. H. Bergtold's "a study of the incubation periods of birds—what determines their length?", 95; review of "Birds of America", 97; review of Robert Cushman Murphy's "Natural history observations from the Mexican portion of the Colorado desert", 97; extension of the known distribution of some northern California birds, 190; the Virginia warbler in California, 193
- Grosbeak, Black-headed, 14, 19  
Evening, 45  
Western Blue, 169  
Western Evening, 71, 168
- Grouse, Blue, 185  
Ruffed, 185

- Sierra, 45  
 Guara rubra, 78  
 Guiraca caerulea lazula, 169  
   caerulea salicarius, 92  
 Gull, Bonaparte, 27, 77, 85  
   Franklin, 27, 175, 177, 178, 192  
   Glaucous-winged, 184  
   Heermann, 122, 145, 185, 187  
   Herring, 184  
   Short-billed, 184  
   Swallow-tailed, 116  
   Western, 124
- H**
- Haliaeetus leucocephalus, 185  
 Hanna, Wilson C., nesting notes from the San Bernardino Valley, 126; first occurrence of the dwarf cowbird in the San Bernardino Valley, California, 211  
 Hansen, Harold E., two midwinter records for San Francisco County, California, 93  
 Hansen, Harold E., and Squires, Walter A., the destruction of birds at the light-houses on the coast of California, 6  
 Hasselborg, Allen E., bird notes from Admiralty Island, southeastern Alaska, 191  
 Hawk, American Sparrow, 73, 127  
   Cooper, 18, 40, 127  
   Florida Red-shouldered, 40  
   Harris, 40, 212  
   Marsh, 18, 30, 35, 40, 111, 113, 127, 132, 134  
   Pigeon, 185  
   Red-tailed, 107  
   Rough-legged, 91  
   Sennett White-tailed, 212  
   Sharp-shinned, 127  
   Swainson, 191  
   Western Red-tailed, 72, 127, 191  
 Heleodytes brunneicapillus couesi, 43, 189  
 Hen, Heath, 146  
 Henshaw, F. W., some pugnacious coots, 92  
 Heron, Anthony Green, 169  
   Black-crowned Night, 28, 29, 35, 39, 171, 172  
   Great Blue, 18, 185  
   Green, 39  
   Louisiana, 39  
 Hesperiphona vespertina californica, 45  
   vespertina montana, 71, 168  
 Heterorhynchus olivaceus, 114  
 Himantopus mexicanus, 126  
 Hirundo erythrogaster, 92  
   rustica, 92  
   rustica erythrogaster, 92  
   rustica palmeri, 92  
 Holleman, Ridley, and Quillin, Roy W., the breeding birds of Bexar County, Texas, 37  
 Howell, A. B., review of E. R. Kalmbach's "the crow and its relation to man", 140  
 Hummingbird, Allen, 146  
   Anna, 16, 18, 75  
   Black-chinned, 21, 41, 46  
   Blue-throated, 168  
   Broad-tailed, 21, 87, 168  
   Calliope, 16, 70, 74  
   Costa, 21, 114, 168, 196  
   Rivoli, 168  
   Rufous, 146, 186  
 Hunt, Richard, the tragical addition of a new bird to the Campus list, 125  
 Hydranassa tricolor ruficollis, 39  
 Hyllocichla aonalaschkae auduboni, 61  
   guttata auduboni, 89  
   guttata polionota, 89  
   guttata sequoiensis, 24, 89  
   guttata slevini, 192  
   ustulata oedica, 61  
   ustulata swainsoni, 89  
   ustulata ustulata, 192
- I**
- Ibis, Scarlet, 78  
   White-faced Glossy, 39  
   Wood, 126  
 Icteria virens virens, 43  
 Icterus bullocki, 42, 170  
   cucullatus nelsoni, 170  
   parisorum, 22, 170  
 Ingersoll, A. M., second occurrence of Wilson plover in California, 187  
 Ionornis martinica, 39  
 Iridoprocne bicolor, 42, 71, 85
- J**
- Jaeger, Long-tailed, 85  
 Jay, Arizona, 21  
   Belding, 60, 98  
   Blue-fronted, 16, 76  
   California, 12, 18, 71, 98  
   Canada, 186, 206, 208  
   Long-crested, 168  
   Long-tailed, 190  
   Oregon, 83  
   Pinyon, 74, 190, 201  
   Rocky Mountain, 197  
   Steller, 186  
   Texas, 212  
   Woodhouse, 71  
   Xantus, 98  
 Junco, Arizona, 168  
   Red-backed, 21, 22, 23  
   Sierra, 76, 189  
   Thurber, 15

- Junco annectens*, 142  
*bairdi*, 57  
*dorsalis*, 142  
*hyemalis connectens*, 84, 142  
*hyemalis hyemalis*, 142  
*hyemalis montanus*, 142  
*hyemalis thurberi*, 15  
*oreganus couesi*, 142  
*oreganus shufeldti*, 84, 142  
*oreganus thurberi*, 76, 189  
*phaeonotus dorsalis*, 22  
*phaeonotus palliatus*, 23, 168  
*ridgwayi*, 142
- K
- Kalmbach, E. R., review of his "the crow and its relation to man", 140  
 Killdeer, 30, 35, 39, 66, 69  
 Kingbird, 27, 30, 34, 44, 111, 172, 177  
   *Arkansas*, 34, 176, 190  
   *Cassin*, 168, 169  
 Kingfisher, 186  
   *Texas*, 41  
   *Western Belted*, 72, 73  
 Kinglet, 186  
   *Sitka*, 85  
   *Western Golden-crowned*, 24  
   *Western Ruby-crowned*, 72, 77, 78  
 Kirn, A. J., supposed new record for central *Kansas*, 191  
 Kitchin, E. A., the rough-legged hawk in western *Washington*, 91
- L
- Lanius borealis*, 61  
   *ludovicianus*, 209  
   *ludovicianus anthonyi*, 209  
   *ludovicianus gambeli*, 209  
   *ludovicianus mearnsi*, 209  
   *ludovicianus mexicanus*, 209  
   *ludovicianus nelsoni*, 209  
*Lanivireo solitarius*, 141  
   *solitarius cassini*, 19  
   *solitarius plumbeus*, 168  
 Lark, Horned, 69  
   *Yuma Horned*, 146  
*Larus argentatus*, 184  
   *brachyrhynchus*, 184  
   *franklini*, 192  
   *glaucescens*, 184  
   *heermanni*, 122, 185, 187  
   *philadelphia*, 77, 85  
 Leopold, Aldo, do purple martins inhabit bird boxes in the west?, 93; are red-headed woodpeckers moving west?, 122  
 Litsey, John B., an eastern record for the *Townsend solitaire*, 44  
 Littlejohn, Chase, lesser yellow-legs and pectoral sandpiper in *San Mateo County, California*, 44  
   *Longspur, Chestnut-collared*, 87, 113  
   *Loon, Common*, 184  
     *Pacific*, 24  
   *Loxia curvirostra bendirei*, 22, 24  
     *curvirostra stricklandi*, 22  
     *leucoptera*, 85  
   *Lunda cirrhata*, 178
- M
- Macrorhamphus griseus scolopaceus*, 85  
 Magpie, *American*, 72, 176, 189  
 Mailliard, Joseph, early autumn birds in *Yosemite Valley*, 11; additional records of the *European widgeon* in *California*, 122; the *Yolla Bolly fox sparrow*, 138; new records for some of the islands off the coast of southern *California*, 189; when the thrushes cease from singing, 192  
 Mallard, 33, 35, 37, 67, 75, 133, 191  
*Mareca americana*, 188  
   *penelope*, 93, 122, 187, 192  
*Marila collaris*, 24  
 Martin, *Purple*, 42, 47, 61, 93, 132, 136  
 Meadowlark, *Western*, 34, 61, 68, 69, 100, 112, 134  
*Megalestris skua*, 179  
*Megaquiscalus major macrourus*, 42  
*Melanerpes erythrocephalus*, 122  
   *fornicivorus bairdi*, 16  
*Meleagris gallopavo intermedius*, 212  
*Melopelia asiatica*, 169  
*Melospiza lincolni lincolni*, 17, 189  
   *lincolni striata*, 17, 18  
   *melodia clementae*, 124  
   *melodia cooperi*, 126  
   *melodia fisherella*, 17, 18, 45, 126  
   *melodia melodia*, 214  
   *melodia rufina*, 186  
   *melodia saltonis*, 126  
 Merganser, *American*, 70, 73, 185  
*Mergus americanus*, 70  
 Miller, Loye, the eastern kingbird in *California* again, 44; a surprising trait in the black-necked stilt, 126; the Kaeding petrel in *California*, 211; first flights of a young golden eagle, 212  
*Mimus polyglottos leucopterus*, 190  
   *polyglottos polyglottos*, 43  
 Mockingbird, 43, 190  
*Molothrus ater obscurus*, 41, 211  
 Munro, J. A., the *Barrow golden-eye* in the *Okanagan Valley, British Columbia*, 3; review of his "report of field work in *Okanagan and Shuswap districts* in 1916", 48  
 Murphy, Robert Cushman, review of his "natural history observations from the *Mexican portion of the Colorado desert*", 97

Murre, California, 178  
 Murrelet, Marbled, 98, 184  
 Muscivora forficata, 41, 212  
 Myadestes townsendi, 44  
 Mycteria americana, 126  
 Myiarchus cinerascens cinerascens, 41, 168  
   crinitus, 41  
   lawrencei olivascens, 168  
   magister magister, 22, 168  
 Myiochanes pertinax pallidiventris, 21  
   richardsoni richardsoni, 46, 96  
 Myiodynastes luteiventris, 96, 168

## N

Nannus hiemalis, 186  
   hiemalis pacificus, 190  
 Nettion carolinensis, 185  
 Nighthawk, Pacific, 24, 73, 78  
   Texas, 41  
 Nutcracker, Clarke, 199, 202  
 Nuthatch, Canada, 46  
   Inyo Slender-billed, 88  
   Pigmy, 21, 73  
   Red-breasted, 12, 16  
   Rocky Mountain, 2  
   Slender-billed, 75  
   White-breasted, 176  
 Nuttallornis borealis, 46  
 Nyctea nyctea, 45, 93, 193  
 Nycticorax nycticorax naevius, 39

## O

Oberholser, Harry C., description of a new subspecies of *Cyanolaemus clemenciae*, 181; description of a new *Lanius* from Lower California, 209  
 Oceanodroma beldingi, 60  
   furcata, 180  
   leucorhoa beali, 46  
   leucorhoa beldingi, 46  
   leucorhoa kaedingi, 46, 211  
   leucorhoa leucorhoa, 46  
 Ochthodromus wilsonius wilsonius, 187  
 Oidemia americana, 85  
   deglandi, 185  
 Olor columbianus, 93  
 Oporornis formosus, 43  
   tolmiei, 17, 76  
 Oreortyx picta plumifera, 61  
 Oreospiza chlorura, 15, 73  
 Oriole, Arizona Hooded, 170  
   Baltimore, 176  
   Bullock, 42, 170  
   Scott, 22, 170  
 Ornismya costae, 114  
 Otus asio aikenii, 24  
   asio bendirei, 127  
   asio kennicotti, 185  
   asio mcalli, 40  
   asio quercinus, 127

Ouzel, Water, 13, 70, 78  
 Owl, Aiken Screech, 24  
   Barn, 40  
   Burrowing, 30, 40, 176  
   California Pigmy, 18  
   California Screech, 127  
   Dusky Horned, 45  
   Flammulated, 58  
   Horned, 191  
   Long-eared, 127, 134, 195  
   Pacific Horned, 125, 127, 195  
   Pigmy, 58, 127  
   Rocky Mountain Pigmy, 86  
   Screech, 185  
   Short-eared, 101, 112, 113, 125, 127  
   Snowy, 45, 93, 193  
   Southern California Screech, 127  
   Texas Barred, 40  
   Western Barred, 58  
   Western Horned, 40  
 Oxyechus vociferus, 39

## P

Palmer, T. S., Costa's hummingbird—its type locality, early history and name, 114; another reference to early experiments in keeping hummingbirds in captivity, 123; Pacific coast records of the European widgeon, 187  
 Parabuteo unicinctus harrisi, 40, 212  
 Parrot, Thick-billed, 100  
 Partridge, Chestnut-bellied, 39  
 Parus montanus, 61  
 Passer domesticus, 42  
 Passerculus alaudinus, 123  
   beldingi, 57, 60  
   sandwichensis nevadensis, 17, 18  
 Passerella iliaca brevicauda, 139  
   iliaca megarhyncha, 75  
   iliaca stephensi, 138, 139  
 Passerina amoena, 19, 23, 212  
   cyanea, 23, 24  
 Pearson, T. Gilbert, review of his "the bird study book", 48  
 Pelican, California Brown, 124  
   White, 29, 47  
 Penthestes carolinensis agilis, 43  
   gambeli gambeli, 13, 21, 71  
   rufescens, 186  
 Perisoreus canadensis, 186  
   canadensis capitalis, 197  
   obscurus griseus, 84  
   obscurus obscurus, 83  
   obscurus rathbuni, 83  
 Petrel, Belding, 60  
   Fork-tailed, 180  
   Kaeding, 211  
 Petrochelidon lunifrons lunifrons, 42, 91  
 Peuceaea cassini, 42  
 Peucedramus olivaceus, 168

- Pewee, Western Wood, 46, 96, 168  
Wood, 176
- Peyton, Laurence, large sets of eggs of the western red-tailed hawk, 191
- Phainopepla, 193
- Phainopepla nitens, 193
- Phalacrocorax dilophus albociliatus, 57  
penicillatus, 85
- Phalaenoptilus nuttalli californicus, 144  
nuttalli nuttalli, 41
- Phalarope, Northern, 192  
Red, 192  
Wilson, 44, 65
- Phalaropus fulicarius, 192
- Phaleris psittacula, 85
- Phloeotomus pileatus, 186  
pileatus abieticola, 13  
pileatus picinus, 45
- Phoebe, 41  
Black, 14, 190
- Pica pica hudsonia, 72, 189
- Pierce, Wright M., Salton Sink song sparrow at Oro Grande, California, 126
- Pigeon, Band-tailed, 15, 45, 185
- Pintail, 30, 32, 33, 34, 35, 77, 123
- Pipilo aberti, 169  
crissalis, 117  
crissalis carolae, 118, 119  
crissalis crissalis, 118, 119, 139  
crissalis senicula, 118, 119  
erythrophthalmus alleni, 23  
erythrophthalmus erythrophthalmus, 23  
fuscus, 117  
fuscus carolae, 118  
fuscus mesoleucus, 169  
fuscus senicula, 117  
maculatus, 83, 117  
maculatus curtatus, 87  
maculatus falcinellus, 15, 87  
maculatus montanus, 87
- Pipit, 45, 98, 112  
Sprague, 24
- Piranga hepatica, 21, 168  
ludoviciana, 14, 21, 46, 168  
rubra cooperi, 169  
rubra rubra, 42
- Pisobia maculata, 44
- Planesticus migratorius, 186  
migratorius propinquus, 14, 168
- Plegadis guarauna, 39, 61
- Plover, Mountain, 56, 109, 157  
Semipalmated, 185  
Upland, 64, 112, 113  
Wilson, 187
- Podasocys montanus, 157, 163
- Podilymbus podiceps, 189
- Polioptila caerulea caerulea, 44  
caerulea obscura, 19
- Polyborus cheriway, 40
- Poor-will, 41
- Progne subis subis, 42, 93
- Psaltriparus minimus, 117  
plumbeus, 170
- Ptarmigan, 185
- Ptychorhamphus aleuticus, 180
- Puffin, Tufted, 178, 180
- Puffinus creatopus, 85, 178  
fuliginosus, 178  
griseus, 185
- Pyrocephalus rubinus mexicanus, 41, 167
- Pyrrhuloxia, Arizona, 169  
Texas, 42
- Pyrrhuloxia sinuata sinuata, 169  
sinuata texana, 42
- Q**
- Quail, Mountain, 56, 61
- Querquedula cyanoptera, 38
- Quillin, Roy W., and Holleman, Ridley, the breeding birds of Bexar County, Texas, 37
- Quiscalus quiscula aeneus, 42
- R**
- Rail, Belding, 60  
Sora, 31, 64, 65, 69
- Rallus beldingi, 58, 60
- Raven, 107, 186
- Ray, Milton S., six weeks in the high Sierras in nesting time, 70
- Redhead, 5, 26
- Redpoll, 129
- Redstart, Painted, 21, 168
- Red-tail, Western, 40
- Regulus calendula cineraceus, 72  
calendula grinnelli, 85  
satrapa olivaceus, 24
- Riparia riparia, 90
- Roadrunner, 40
- Robin, 186  
Western, 14, 168
- Rough-leg, Ferruginous, 127, 136
- S**
- Salpinctes obsoletus obsoletus, 19, 126
- Sandpiper, Pectoral, 44  
Spotted, 27, 136  
Western, 185
- Sapsucker, Red-breasted, 18  
Sierra, 24  
Sierra Red-breasted, 72, 73, 74  
Williamson, 45, 72, 73, 74, 76
- Sayornis nigricans, 14, 190  
phoebe, 41
- Scardafella inca, 40, 169
- Scaup, 3, 26
- Schussler, George W., the salt-marsh yellowthroats of San Francisco, 62
- Scoter, American, 85  
White-winged, 25, 132, 175, 185

- Selasphorus platycercus*, 21, 87, 168  
     *rufus*, 13, 16, 123, 186  
 Sell, R. A., the scarlet ibis in Texas, 78  
*Setochalcis vocifera arizonae*, 91  
*Setophaga picta*, 21, 168  
 Shearwater, 185  
     Pink-footed, 85, 178  
     Sooty, 178  
 Shoveller, 27, 30, 31, 32, 33, 34, 38, 67  
*Sialia mexicana occidentalis*, 16, 18, 71  
     *sialis sialis*, 44  
*Sitta canadensis*, 12, 46  
     *carolinensis aculeata*, 75, 88  
     *carolinensis nelsoni*, 21, 88  
     *carolinensis tenuissima*, 88  
     *pygmaea leuconucha*, 58  
     *pygmaea pygmaea*, 21, 73  
 Skua, 179, 180  
 Smith, Austin Paul, September notes from  
     Keddie, Plumas County, California, 45;  
     whip-poor-will in New Mexico, 91;  
     some Texas bird notes, 212  
 Snipe, Wilson, 74, 85, 136  
 Solitaire, Townsend, 44, 57  
 Sora, 67, 136, 170  
 Sparrow, Baird, 98  
     Belding Marsh, 60  
     Bell, 98, 190  
     Black-chinned, 22, 42  
     Brewer, 17, 18  
     Cassin, 42  
     Clay-colored, 25, 28, 68, 112, 176  
     Desert, 23  
     English, 42  
     Forbush, 17, 18  
     Gambel, 15, 16, 18  
     Harris, 24  
     Lincoln, 17, 189  
     Modoc Song, 18, 45, 126  
     Nelson, 64, 67  
     Nevada Savannah, 17, 18  
     Rock, 42, 212  
     Rufous-crowned, 98  
     Salton Sink Song, 126  
     San Diego Song, 126  
     Savannah, 34, 67, 112  
     Song, 28, 69, 176, 186  
     Stephens Fox, 138  
     Thick-billed, 61, 75, 77  
     Vesper, 69, 70, 112  
     Western Chipping, 15, 16, 189  
     Western Grasshopper, 42  
     Western Lark, 42, 190, 212  
     White-crowned, 15, 61  
     Yolla Bolly Fox, 138  
*Spatula clypeata*, 38  
*Speotyto cunicularia hypogaea*, 40  
*Spiza americana*, 42  
*Spizella atrogularis*, 22  
     *breweri*, 17  
     *passerina arizonae*, 15, 189  
*Sphyrapicus ruber ruber*, 18  
     *thyroideus thyroideus*, 45, 72  
     *varius daggetti*, 24, 72  
 Spoonbill, 9  
     Roseate, 79  
 Squires, Walter A., and Hansen, Harold E.,  
     the destruction of birds at the light-  
     houses on the coast of California, 6  
*Stellula calliope*, 16, 70  
 Stephens, Frank,—an autobiography, 164  
*Stercorarius longicauda*, 85  
*Sterna hirundo*, 180  
     *paradisaea*, 85  
 Stilt, Black-necked, 126  
*Strix varia helveola*, 40  
 Surf-bird, 85  
 Swallow, American Barn, 34, 37, 68, 92  
     Bank, 90  
     Cliff, 52, 71, 72, 73, 75, 76, 91, 105, 109  
     Tree, 71, 85  
     Violet-green, 105  
 Swan, Whistling, 93  
 Swarth, H. S., notes on some birds from  
     central Arizona, 20; review of J. A.  
     Munro's "report of field work in Oka-  
     nagan and Shuswap districts in  
     1916", 48; the subspecies of the Ore-  
     gon Jay, 83; review of Frank S. Chap-  
     man's "distribution of bird life in  
     Colombia", 95; the distribution of the  
     subspecies of the brown towhee  
     (*Pipilo crissalis*), 117; review of P. A.  
     Taverner and R. M. Anderson's "sum-  
     mary report of the geological survey  
     of Canada", 141; review of Jonathan  
     Dwight's "the geographical distribu-  
     tion of color and of other variable  
     characters in the genus Junco: a new  
     aspect of specific and subspecific val-  
     ues", 142; review of Charles B. Cory's  
     "catalogue of birds of the Americas  
     and adjacent islands in Field museum  
     of natural history", 143  
 Swift, Chimney, 176  
     Vaux, 16, 18  
     White-throated, 16, 103, 196
- T
- Tachytriorchis albicaudatus sennetti*, 212  
 Tanager, Cooper, 169  
     Hepatic, 21, 168  
     Summer, 42  
     Western, 14, 21, 46, 168, 196  
 Taverner, P. A., and Anderson, R. M., re-  
     view of their "summary report of the  
     geological survey of Canada for  
     1916", 141  
 Taverner, P. A., some summer birds of Alert



- Bay, British Columbia, 183; Heermann  
Gull with white primary coverts, 187;  
trinomials and current practice, 213
- Taylor, Henry Reed, death notice, 47
- Teal, Blue-winged, 31, 65, 67  
Cinnamon, 38, 123  
Green-winged, 185
- Tern, Arctic, 85  
Black, 32, 111, 112, 113, 175  
Common, 180
- Thrasher, Curve-billed, 43  
Pasadena, 126
- Thrush, Big Tree, 59  
Dwarf Hermit, 145  
Monterey Hermit, 192  
Russet-backed, 192  
Sierra Hermit, 24  
White Mountains Hermit, 89
- Thryomanes bewicki, 83  
bewicki cryptus, 43
- Thryothorus ludovicianus ludovicianus, 43
- Titmouse, Bridled, 21  
Plain, 98  
Sennett, 43
- Totanus flavipes, 44
- Towhee, Abert, 97, 169  
California Brown, 97, 117  
Canyon, 117, 169  
Green-tailed, 15, 73, 77  
Mountain, 87  
Sacramento, 15  
Spotted, 83
- Toxostoma curvirostre curvirostre, 43  
redivivum pasadenense, 126
- Trochilus topiltzin, 181
- Troglodytes aedon parkmani, 19, 75, 168
- Turdus sequoiensis, 59
- Turkey, Rio Grande, 212
- Tyrannus tyrannus, 44  
verticalis, 18, 170, 190  
vociferans, 168, 170

## U

- Uria troille californica, 178

## V

- Verdin, 43, 98
- Vermivora celata lutescens, 16, 18  
celata sordida, 189  
luciae, 168  
rubricapilla gutturalis, 17  
virginiae, 168, 193
- Vireo, Bell, 43, 98  
Black-capped, 212  
California Least, 211  
Cassin, 19, 141  
Gray, 98  
Plumbeous, 168  
Warbling, 176

- Western Warbling, 16, 19, 168  
White-eyed, 43
- Vireo atricapillus, 212  
belli belli, 43  
belli medius, 212  
belli pusillus, 211  
griseus griseus, 43
- Vireosylva gilva swainsoni, 16, 19, 168
- Vulture, Black, 24, 38, 40  
Turkey, 38, 40

## W

- Walker, Alex, corrections, 44
- Warbler, Audubon, 16, 22, 70, 74, 189  
Black-throated Gray, 46  
Calaveras, 17  
California Yellow, 211  
Dusky, 189  
Golden-cheeked, 43  
Golden Pileolated, 19  
Grace, 168  
Kentucky, 43  
Lucy, 98, 168  
Lutescent, 16, 17, 18  
Macgillivray, 17  
Olive, 168  
Red-faced, 21, 98, 168  
Sonora Yellow, 168  
Tolmie, 76  
Virginia, 168, 193  
Yellow, 15, 19, 30, 172, 176
- Warburton, Stanley, Jr., some oceanic birds  
from off the coast of Washington and  
Vancouver Island, 178; late snowy owl  
dates, 193
- Waxwing, Cedar, 186
- Wetmore, Alexander, a note on the tracheal  
air-sac in the ruddy duck, 19
- Whip-poor-will, Stephens, 22, 91
- Widgeon, American, 123  
European, 93, 122, 187, 192
- Willard, F. C., evidence that many birds re-  
main mated for life, 167
- Willet, 34, 113
- Willett, George, bird notes from Forrester  
Island, Alaska, 85; a peculiarity of  
plumage in some specimens of the  
Heermann gull, 122
- Wilsonia pusilla chryseola, 19
- Woodpecker, Baird, 41  
Batchelder, 22  
Cabanis, 16, 169  
Cactus, 169  
California, 16  
Golden-fronted, 41  
Hairy, 186  
Lewis, 18  
Modoc, 71, 72, 73, 76  
Northern Pileated, 13  
Pileated, 45, 186  
Red-bellied, 24

Red-headed, 26, 69, 122  
 Texas, 41  
 Valdez Downy, 85  
 White-breasted, 86  
 White-headed, 45  
 Willow, 16  
 Wren, Bewick, 83  
   Cactus, 43, 189  
   Canyon, 43, 98, 168  
   Carolina, 43  
   House, 28, 69, 136  
   Parkman, 75  
   Rock, 19, 126  
   Texas Bewick, 43  
   Western House, 19, 168  
   Western Winter, 190  
   Winter, 186  
 Wren-tit, 98  
 Wyman, L. E., notes from southern California, 192

## X

*Xenopicus albolarvatus albolarvatus*, 45

## Y

Yellowlegs, Lesser, 44  
 Yellowthroat, Belding, 60  
   Maryland, 25, 28, 34, 176  
   Salt-marsh, 62  
   Western, 16, 169

## Z

*Zamelodia melanocephala*, 14, 19  
*Zenaidura macroura carolinensis*, 169  
   *macroura marginella*, 39  
*Zonotrichia albicollis*, 61  
   *leucophrys gambeli*, 15, 18  
   *leucophrys leucophrys*, 15  
   *querula*, 24
